# Supplementary material for: Liposome-tethered supported lipid bilayer platform for capture and release of heterogeneous populations of circulating tumor cells
Source: Royal Society of Chemistry journal article supplement (doi:10.1039/d3tb00547j), 2023-01-01
Supplement: d3tb00547j1.pdf [file d3tb00547j1.pdf]

## Supporting Information

# **Liposome-Tethered Supported Lipid Bilayer Platform for Capture and Release of Heterogeneous Populations of Circulating Tumor Cells**

*Po-Ying Yeh<sup>1,2</sup>, Jia-Yang Chen<sup>1,2</sup>, Mo-Yuan Shen<sup>1,2</sup>, Ting-Fang Che<sup>1</sup>, Syer Choon Lim<sup>1</sup>, Jocelyn Wang<sup>5</sup>, Wen-Sy Tsai<sup>3,4</sup>, Curtis W. Frank<sup>2</sup>, Chun-Jen Huang<sup>6,7\*</sup>, Ying-Chih Chang<sup>1,2\*</sup>*

<sup>1</sup> Genomics Research Center, Academia Sinica, 128, Sec 2, Academic Rd., Nankang, Taipei 115, Taiwan

<sup>2</sup> Department of Chemical Engineering, Stanford University, Stanford, CA 94305

<sup>3</sup> Division of Colon and Rectal Surgery, Chang Gung Memorial Hospital, Linkou, Taoyuan, Taiwan

<sup>4</sup> Graduate Institute of Clinical Medical Science, Chang Gung University, Linkou, Taoyuan, Taiwan

<sup>5</sup> The College, The University of Chicago, Chicago, IL 60637, USA

<sup>6</sup> Department of Chemical & Materials Engineering, and NCU-Covestro Research Center, National Central University, Zhong-Li, Taoyuan 320, Taiwan.

<sup>7</sup> R&D Center for Membrane Technology, Chung Yuan Christian University, 200 Chung Pei Rd., Chung-Li City 32023, Taiwan

Corresponding authors: yingchih@gate.sinica.edu.tw(YCC); cjhuang@ncu.edu.tw (CJH)

Current address: For Po-Ying Yeh, Jia-Yang Chen, Mo-Yuan Shen: Acrocyte Therapeutics Inc., 12-8F, 99, Sec. 1, Xintai 5th Rd, Xizhi Dist. New Taipei City, Taiwan, 22175 . For Ting-Fang Che: Biomedical Translational Research Center, Academia Sinica, Taipei, Taiwan.

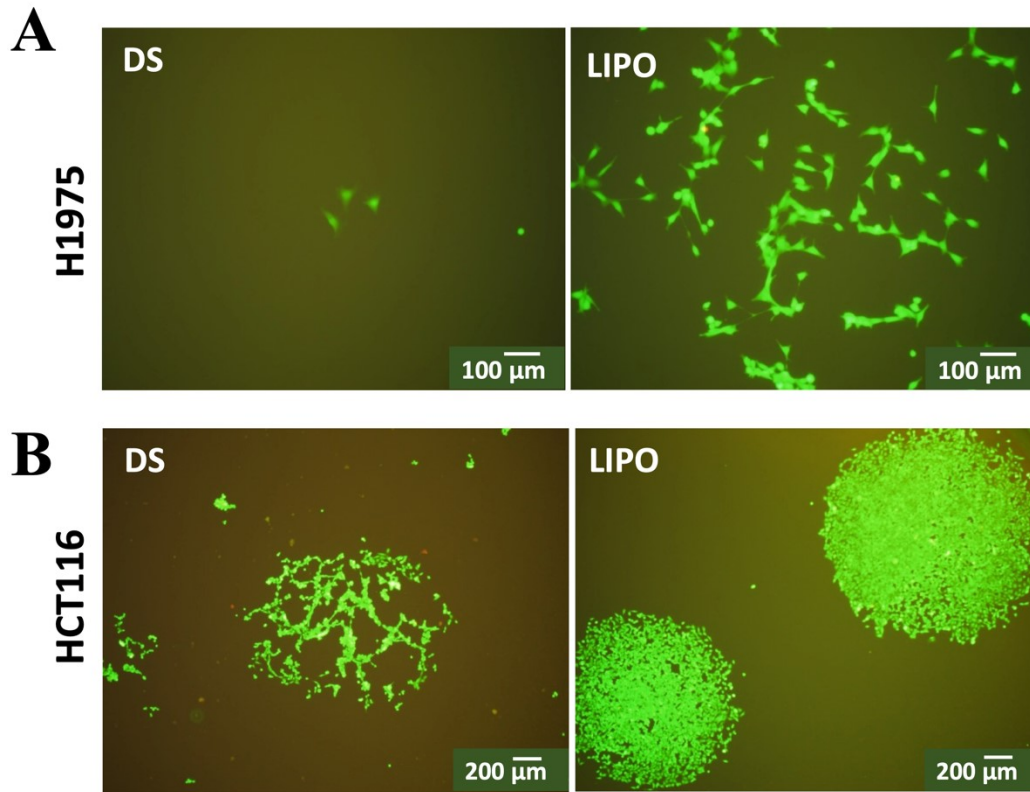

**Fig. S1** Proliferation tests of DS and LIPO platforms. **(A)** The H1975 cell morphology after capture from whole blood spiking, released and subsequent 10-day culture on TCP plates using LIPO platform (166 cells) and DS platform (4 cells). The cells were labeled with cell tracker, CMFDA dye, for 30 min before taking IF images. **(B)** The morphology of HCT116 cell captured from whole blood, release and subsequent 8-day culture using the LIPO platform and DS platform. The cells were labeled with LIVE/DEAD Viability/Cytotoxicity assay, for 30 min before taking fluorescence images.

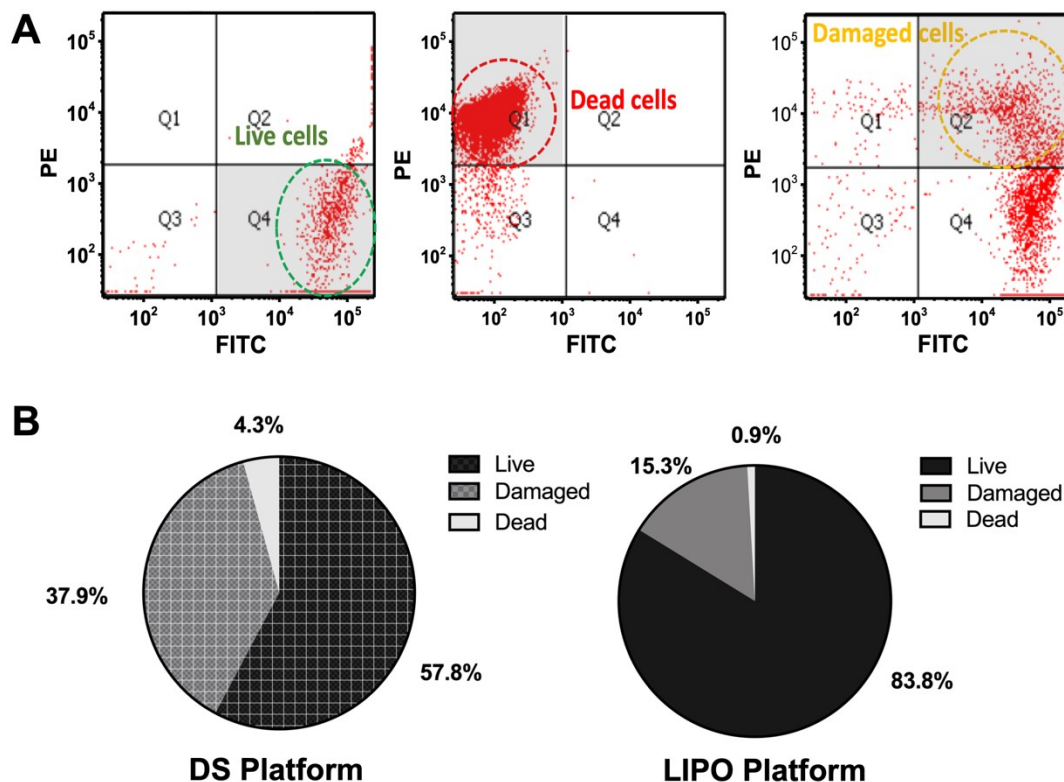

**Fig. S2** The LIVE/DEAD assay determination by FACS analysis. (A) The gating regions of live, dead, and damaged H1975 cells by FACS flow cytometry. The H1975 cells were labeled with LIVE/DEAD cell viability assay before analyzed with FACS cytometry. (B) The pie chart of live/dead/damaged cell population released from either DS-SLB or LIPO-SLB platforms.

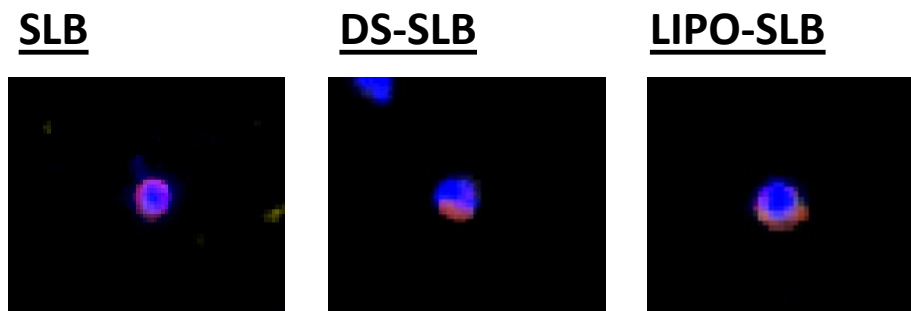

**Fig. S3** Representative immune fluorescence staining images for head and neck squamous cell carcinoma (HNSCC) captured and released from the platforms of SLB, DS-SLB and LIPO-SLB. The captured cells were stained for antigens of EpCAM and panCK along with DNA with DAPI.
